# Supplementary material for: Insight into the microbial world of Bemisia tabaci cryptic species complex and its relationships with its host
Source: PubMed Central journal article supplement (PMC6484021; doi:10.1038/s41598-019-42793-8), 2019-04-25
Supplement: 41598_2019_42793_MOESM1_ESM.pdf [file 41598_2019_42793_MOESM1_ESM.pdf]

# Supplementary information for “Insight into the microbial world of *Bemisia tabaci* cryptic species complex and its relationships with its host”

Hua-Ling Wang<sup>1,2</sup>, Teng Lei<sup>1</sup>, Wen-Qiang Xia<sup>1</sup>, Stephen L. Cameron<sup>3</sup>, Yin-Quan Liu<sup>1</sup>, Zhen Zhang<sup>1</sup>, Maruthi M N Gowda<sup>2</sup>, Paul De Barro<sup>4</sup>, Jesús Navas-Castillo<sup>5</sup>, Christopher A Omongo<sup>6</sup>, H  l  ne Delatte<sup>7</sup>, Kyeong-Yeoll Lee<sup>8</sup>, Mitulkumar V. Patel<sup>2</sup>, Renate Krause-Sakate<sup>9</sup>, James Ng<sup>10</sup>, SanLing Wu<sup>1</sup>, Elvira Fiallo-Oliv  s<sup>5</sup>, Shu-Sheng Liu<sup>1</sup>, John Colvin<sup>2\*</sup>, Xiao-Wei Wang<sup>1\*</sup>

<sup>1</sup>Insects, Institute of Insect Sciences, Zhejiang University, 866 Yuhangtang Road, Hangzhou 310058, China

<sup>2</sup>Natural Resources Institute, University of Greenwich, Kent ME4 4TB, United Kingdom

<sup>3</sup>Department of Entomology, Purdue University, 901 West State Street, West Lafayette, IN 479074, USA

<sup>4</sup>CSIRO Ecosystem Sciences, Brisbane QLD 4001, Australia

<sup>5</sup>Instituto de Hortofruticultura Subtropical y Mediterr  nea “La Mayora”, Universidad de M  laga – Consejo Superior de Investigaciones Cient  ficas (IHSM-UMA-CSIC), 29750 Algarrobo-Costa, M  laga, Spain

<sup>6</sup>National Crops Resources Research Institute, Namulonge, P.O. Box 7084, Kampala, Uganda

<sup>7</sup>CIRAD, UMR PVBMT CIRAD-Universit  de La R  union, P  le de Protection des Plantes, 7 chemin de l’IRAT, 97410 Saint-Pierre, Ile de La R  union, France

<sup>8</sup>School of Applied Biosciences, Kyungpook National University, Daegu 702-701, Republic of Korea

<sup>9</sup>UNESP, Faculdade de Ci  ncias Agron  micas, 18610-307, Botucatu, Brazil

<sup>10</sup>Department of Plant Pathology and Microbiology, University of California, Riverside, California 92521, USA

# Correspondence to: John Colvin and Xiao-Wei Wang

Telephone numbers: Colvin = +(44)-(0)1634-883310; Wang = +(86)-(0)571-88982435

**Table S1** PacBio sequencing barcode, raw reads and clean reads for each sample.

| Sample ID                   | Barcode1               | Barcode2             | Raw reads | Clean reads |
|-----------------------------|------------------------|----------------------|-----------|-------------|
| Asia I                      | CACACTGAAATCCGTACAGC   | ACACGTCACCAGTGTATGCA | 3140      | 2929        |
| Asia II 1                   | CTAGAGCTGGATCGCAGATC   | ATGCTACGTTAGGGCTCGTA | 2774      | 2602        |
| Asia II 3                   | TCACGACACTAACCTCCGCT   | GCTACGATGCACACACGTTA | 2368      | 1921        |
| Asia II 5                   | GACTAGAGGGATGGTGTTCG   | TGCATCGACGGAGCTATGGT | 3243      | 2953        |
| Asia II 6                   | TACGTACGACACCTGGTGAT   | GACAGTGACCTCGTTCGACT | 2123      | 2018        |
| Asia II 7                   | GCTATACGGACTTCCCTCG    | TCAGTCAGACGTGTACCCAA | 3375      | 3139        |
| Asia II 9                   | ACACACTGGGAGACAAGGGA   | CTACGTAGGTACATAACGGT | 2880      | 2724        |
| Australia                   | AGACACAGTATCGTTGACCA   | CACAGTGTGAGTCACTGGT  | 2655      | 2514        |
| <i>Bemisia afer</i> _Africa | AGAGACTGACGCGCAGATAC   | CACTCTGTTACAGATGGCTC | 3884      | 3683        |
| <i>Bemisia afer</i> _China  | TCAGCACAATGTGCACGACT   | GACTCTGATCCAAAGTGTTT | 3342      | 3200        |
| China 1                     | TGACTCAGGCTGATGAGCTG   | GTCACTGATCTAGCGTAGTG | 3202      | 3149        |
| China 2                     | ATATCGCGGAACCAAAGGAT   | CGTACGATCACGCCATAATG | 3284      | 3029        |
| Indian Ocean                | CGTATACGATCCCGAATTTG   | AGAGCTCTAAGGAGCGCCTT | 2851      | 2725        |
| Italy 3                     | CTAGTGATCACGGGAGTTG    | ACGAGATGACGCCACGAATG | 3292      | 3182        |
| Japan 2                     | GTAGTGCTCAGTGCATATGC   | TCGATCGATCCGAATTCACA | 3230      | 3006        |
| MED                         | GACACTGTAATCAGTCTCGT   | TGACGACTTCCGACACAATT | 2866      | 2820        |
| MEAM1                       | CACTAGTGTAGGATTGCTCG   | ACAGCTCAAAGAGATGTCGA | 2831      | 2710        |
| New World 1                 | GTAATGCTCAGTATGCGCTGTA | TCACTCTGCAGGCGTATTGG | 4184      | 3134        |
| New World 2                 | GCATGCATTTACTGTGCGAT   | TAGCTACGGACTTGGTATTC | 2860      | 2696        |
| SubSaharan Africa 1         | TGAGCACTGTTGGTCAATCT   | GTCAGTGTCGATCCGTATTA | 3094      | 2827        |
| SubSaharan Africa 2         | ATCGTACGTAGCTCGTAACT   | CTCAGTGAGTCTAATTCCGA | 3179      | 3062        |
| SubSaharan Africa 6         | ACAGACAGAGCTGTTGTTTG   | CTCACTGTTGAGGACTGCA  | 2993      | 2742        |
| Uganda                      | CGATGCATAGGCTACACGAC   | AGACGTCTTACACGATCTAC | 3288      | 3009        |

Table S2 PacBio reads and OTUs of bacteria in experimental samples.

| OTU ID | New World 1 | Asia II 9 | Asia I | Asia II 5 | Asia II 6 | Australia | MEAM1 | Bemisia after_China | Bemisia after_Africa | China 2 | Asia II 7 | Italy 3 | Japan 2 | Indian Ocean | New World 2 | M2D | Sub-Saharan Africa 1 | Sub-Saharan Africa 2 | Uganda | Sub-Saharan Africa 6 | Asia II 3 | Asia II 1 | China 1 | Consensus Lineage                                                                                                                          |                                                                                                                                                                   |                                                                                                                                     |
|--------|-------------|-----------|--------|-----------|-----------|-----------|-------|---------------------|----------------------|---------|-----------|---------|---------|--------------|-------------|-----|----------------------|----------------------|--------|----------------------|-----------|-----------|---------|--------------------------------------------------------------------------------------------------------------------------------------------|-------------------------------------------------------------------------------------------------------------------------------------------------------------------|-------------------------------------------------------------------------------------------------------------------------------------|
| OTU1   | 17          | 3         | 0      | 16        | 1         | 0         | 1     | 0                   | 1                    | 2       | 0         | 1       | 38      | 0            | 0           | 0   | 0                    | 21                   | 641    | 21                   | 0         | 0         | 0       | 5 d_Bacteria; p_Delnoccocus-Thermus; c_Delnococci; o_Thermales; f_Thermaceae; g_Thermus; s_Thermus                                         |                                                                                                                                                                   |                                                                                                                                     |
| OTU2   | 27          | 0         | 0      | 3         | 1         | 0         | 0     | 0                   | 0                    | 0       | 2         | 0       | 0       | 0            | 2           | 0   | 1                    | 3                    | 2      | 0                    | 0         | 0         | 0       | 0 d_Bacteria; p_Proteobacteria; c_Alphaproteobacteria; o_Rhizobiales; f_Phyllobacteriaceae; g_Phyllobacteriaceae; s_Phyllobacteriaceae     |                                                                                                                                                                   |                                                                                                                                     |
| OTU3   | 0           | 1         | 0      | 0         | 926       | 0         | 1785  | 0                   | 0                    | 0       | 0         | 0       | 0       | 0            | 0           | 0   | 0                    | 0                    | 48     | 0                    | 0         | 0         | 0       | 0 d_Bacteria; p_Proteobacteria; c_Alphaproteobacteria; o_Rickettsiales; f_Rickettsiaceae; g_Rickettsia; s_Rickettsia_sp.                   |                                                                                                                                                                   |                                                                                                                                     |
| OTU4   | 37          | 1         | 0      | 2         | 1         | 0         | 0     | 0                   | 1                    | 0       | 0         | 0       | 0       | 0            | 0           | 0   | 4                    | 1                    | 1      | 0                    | 0         | 0         | 0       | 1 d_Bacteria; p_Actinobacteria; c_Actinobacteria; o_Propionibacteriales; f_Propionibacteriaceae; g_Propionibacterium; s_Propionibacterium  |                                                                                                                                                                   |                                                                                                                                     |
| OTU5   | 14          | 0         | 0      | 0         | 0         | 0         | 0     | 0                   | 0                    | 0       | 0         | 0       | 0       | 0            | 0           | 0   | 0                    | 0                    | 0      | 0                    | 1         | 0         | 0       | 0 d_Bacteria; p_Proteobacteria; c_Alphaproteobacteria; o_Sphingomonadales; f_Sphingomonadaceae; g_Sphingomonas; s_Sphingomonas_panni       |                                                                                                                                                                   |                                                                                                                                     |
| OTU6   | 46          | 0         | 0      | 19        | 0         | 0         | 1     | 0                   | 2                    | 0       | 0         | 0       | 3       | 0            | 0           | 4   | 0                    | 2                    | 5      | 0                    | 0         | 0         | 0       | 3 d_Bacteria; p_Actinobacteria; c_Actinobacteria; o_Corynebacteriales; f_Nocardiales; g_Rhodococcus; s_Rhodococcus_erythropolis            |                                                                                                                                                                   |                                                                                                                                     |
| OTU7   | 0           | 0         | 0      | 59        | 0         | 0         | 0     | 0                   | 0                    | 0       | 0         | 0       | 0       | 0            | 0           | 0   | 0                    | 0                    | 0      | 0                    | 0         | 0         | 0       | 0 d_Bacteria; p_Proteobacteria; c_Gammaproteobacteria; o_Enterobacteriales; f_Enterobacteriaceae; g_Arsenophonus; s_Arsenophonus           |                                                                                                                                                                   |                                                                                                                                     |
| OTU8   | 47          | 0         | 0      | 0         | 0         | 0         | 0     | 0                   | 0                    | 0       | 0         | 0       | 0       | 0            | 0           | 0   | 2                    | 0                    | 0      | 0                    | 0         | 0         | 0       | 0 d_Bacteria; p_Proteobacteria; c_Alphaproteobacteria; o_Sphingomonadales; f_Sphingomonadaceae; g_Sphingomonas; s_Sphingomonas_mucosissima |                                                                                                                                                                   |                                                                                                                                     |
| OTU9   | 77          | 2038      | 1741   | 1883      | 191       | 1211      | 125   | 2                   | 1                    | 1793    | 2149      | 89      | 2478    | 2204         | 2571        | 821 | 919                  | 2173                 | 694    | 2430                 | 405       | 1346      | 97      | 0                                                                                                                                          | 97 d_Bacteria; p_Proteobacteria; c_Gammaproteobacteria; o_Oceanospirillales; f_Halomonadaceae; g_Candidatus_Portiera; s_Candidatus_Portiera_aleyrodidarum_BT-QVLC |                                                                                                                                     |
| OTU10  | 0           | 0         | 360    | 0         | 372       | 1218      | 0     | 30                  | 0                    | 941     | 108       | 3049    | 18      | 0            | 0           | 0   | 1209                 | 346                  | 0      | 0                    | 1012      | 0         | 0       | 0                                                                                                                                          | 2689 d_Bacteria; p_Proteobacteria; c_Alphaproteobacteria; o_Rickettsiales; f_Anapiasmataceae; g_Wolbachia; s_Wolbachia_sp.                                        |                                                                                                                                     |
| OTU11  | 0           | 0         | 0      | 0         | 0         | 0         | 0     | 0                   | 0                    | 0       | 0         | 0       | 0       | 0            | 0           | 0   | 0                    | 0                    | 0      | 0                    | 70        | 0         | 0       | 0                                                                                                                                          | 0 d_Bacteria; p_Proteobacteria; c_Gammaproteobacteria; o_Enterobacteriales; f_Enterobacteriaceae; g_Arsenophonus; s_Arsenophonus                                  |                                                                                                                                     |
| OTU12  | 0           | 0         | 0      | 0         | 0         | 0         | 0     | 3155                | 3467                 | 0       | 0         | 0       | 0       | 0            | 0           | 0   | 0                    | 0                    | 0      | 0                    | 0         | 0         | 0       | 0                                                                                                                                          | 0 d_Bacteria; p_Proteobacteria; c_Gammaproteobacteria; o_Oceanospirillales; f_Halomonadaceae; g_Candidatus_Portiera; s_Candidatus_Portiera_aleyrodidarum          |                                                                                                                                     |
| OTU13  | 0           | 65        | 3      | 54        | 28        | 0         | 0     | 54                  | 0                    | 40      | 0         | 27      | 0       | 0            | 0           | 0   | 0                    | 0                    | 958    | 0                    | 0         | 37        | 0       | 0                                                                                                                                          | 0 d_Bacteria; p_Proteobacteria; c_Gammaproteobacteria; o_Enterobacteriales; f_Enterobacteriaceae; g_Arsenophonus; s_Arsenophonus                                  |                                                                                                                                     |
| OTU14  | 0           | 0         | 1      | 3         | 0         | 0         | 0     | 0                   | 0                    | 0       | 0         | 0       | 0       | 0            | 0           | 0   | 0                    | 0                    | 0      | 0                    | 0         | 0         | 0       | 0                                                                                                                                          | 0 d_Bacteria; p_Delnoccocus-Thermus; c_Delnococci; o_Delnococcales; f_Delnococcaceae; g_Delnococcus; s_Delnococcus_thermophilus_DSM_11300                         |                                                                                                                                     |
| OTU15  | 97          | 0         | 0      | 26        | 3         | 0         | 0     | 0                   | 3                    | 2       | 0         | 3       | 3       | 0            | 0           | 7   | 0                    | 8                    | 11     | 0                    | 0         | 0         | 0       | 0                                                                                                                                          | 1 d_Bacteria; p_Proteobacteria; c_Alphaproteobacteria; o_Rhizobiales; f_Hyphomicrobiales; g_Peagibacterium; s_Peagibacterium                                      |                                                                                                                                     |
| OTU16  | 0           | 19        | 61     | 33        | 178       | 52        | 0     | 8                   | 77                   | 0       | 45        | 0       | 81      | 0            | 0           | 0   | 694                  | 1                    | 463    | 0                    | 0         | 60        | 0       | 0                                                                                                                                          | 0 d_Bacteria; p_Proteobacteria; c_Gammaproteobacteria; o_Enterobacteriales; f_Enterobacteriaceae; g_Arsenophonus; s_Arsenophonus_nasoniae                         |                                                                                                                                     |
| OTU17  | 199         | 0         | 0      | 0         | 0         | 0         | 0     | 0                   | 0                    | 0       | 0         | 0       | 0       | 0            | 0           | 0   | 0                    | 0                    | 0      | 0                    | 1         | 0         | 0       | 0                                                                                                                                          | 0 d_Bacteria; p_Proteobacteria; c_Betaproteobacteria; o_Burkholderiales; f_Oxalobacteraceae; g_Massilia; s_Massilia                                               |                                                                                                                                     |
| OTU18  | 0           | 0         | 0      | 28        | 1         | 0         | 1     | 0                   | 0                    | 0       | 0         | 2       | 170     | 3            | 0           | 0   | 2                    | 5                    | 15     | 26                   | 0         | 0         | 0       | 0                                                                                                                                          | 1 d_Bacteria; p_Proteobacteria; c_Betaproteobacteria; o_Burkholderiales; f_Burkholderiaceae; g_Cupriavidus; s_Cupriavidus_uncultured_bacterium                    |                                                                                                                                     |
| OTU19  | 0           | 0         | 0      | 0         | 0         | 1         | 0     | 0                   | 0                    | 0       | 784       | 0       | 0       | 0            | 0           | 0   | 0                    | 1                    | 0      | 0                    | 0         | 0         | 0       | 0                                                                                                                                          | 0 d_Bacteria; p_Proteobacteria; c_Alphaproteobacteria; o_Rickettsiales; f_Rickettsiaceae; g_Rickettsia; s_Rickettsia_endosymbiont_of_Hemiclepsia_marginata        |                                                                                                                                     |
| OTU20  | 5           | 0         | 1      | 247       | 0         | 0         | 0     | 0                   | 0                    | 0       | 0         | 0       | 0       | 0            | 0           | 0   | 0                    | 0                    | 0      | 0                    | 0         | 0         | 0       | 0                                                                                                                                          | 0 d_Bacteria; p_Actinobacteria; c_Actinobacteria; o_Micrococcales; f_Microbacteriaceae; g_Curtobacterium; s_Curtobacterium                                        |                                                                                                                                     |
| OTU21  | 0           | 0         | 0      | 0         | 0         | 0         | 0     | 2                   | 34                   | 0       | 0         | 0       | 0       | 0            | 0           | 0   | 0                    | 0                    | 0      | 194                  | 0         | 1114      | 0       | 0                                                                                                                                          | 0 d_Bacteria; p_Proteobacteria; c_Alphaproteobacteria; o_Rickettsiales; f_Anapiasmataceae; g_Wolbachia; s_Wolbachia_endosymbiont_of_Bemisia_tabaci                |                                                                                                                                     |
| OTU22  | 51          | 0         | 0      | 0         | 0         | 0         | 0     | 0                   | 0                    | 0       | 0         | 0       | 0       | 0            | 0           | 0   | 0                    | 0                    | 0      | 5                    | 0         | 0         | 0       | 0                                                                                                                                          | 0 d_Bacteria; p_Firmicutes; c_Bacilli; o_Bacillales; f_Paenibacillaceae; g_Paenibacillus; s_Paenibacillus_uncultured_Firmicutes_bacterium                         |                                                                                                                                     |
| OTU23  | 0           | 0         | 0      | 1         | 0         | 0         | 0     | 0                   | 0                    | 0       | 0         | 0       | 3       | 0            | 0           | 0   | 0                    | 0                    | 3      | 0                    | 0         | 0         | 0       | 0                                                                                                                                          | 0 d_Bacteria; p_Bacteroidetes; c_Sphingobacteriales; o_Sphingobacteriales; f_env.OPS_17; g_norank; s_unidentified_Cytophagales_OPB73                              |                                                                                                                                     |
| OTU24  | 327         | 0         | 0      | 0         | 0         | 782       | 0     | 0                   | 218                  | 0       | 0         | 0       | 0       | 122          | 1868        | 0   | 0                    | 0                    | 0      | 0                    | 80        | 0         | 0       | 0                                                                                                                                          | 0                                                                                                                                                                 | 0 d_Bacteria; p_Proteobacteria; c_Gammaproteobacteria; o_Enterobacteriales; f_Enterobacteriaceae; g_Candidatus_Hamiltonella_defensa |
| OTU25  | 2015        | 28        | 12     | 633       | 68        | 4         | 15    | 2                   | 43                   | 4       | 1         | 35      | 102     | 9            | 0           | 118 | 3                    | 151                  | 197    | 34                   | 2         | 0         | 0       | 0                                                                                                                                          | 86 d_Bacteria; p_Proteobacteria; c_Gammaproteobacteria; o_Oceanospirillales; f_Halomonadaceae; g_Halomonas; s_Halomonas                                           |                                                                                                                                     |
| OTU26  | 150         | 501       | 0      | 0         | 1         | 0         | 0     | 1                   | 0                    | 0       | 12        | 1       | 83      | 0            | 3           | 0   | 0                    | 347                  | 0      | 0                    | 13        | 0         | 0       | 0                                                                                                                                          | 0 d_Bacteria; p_Bacteroidetes; c_Cytophagia; o_Cytophagales; f_Flammeovirgaceae; g_Candidatus_Cardinium; s_Cardinium_endosymbiont_of_Bemisia_tabaci               |                                                                                                                                     |
| OTU27  | 0           | 0         | 750    | 0         | 221       | 0         | 0     | 0                   | 69                   | 0       | 0         | 0       | 0       | 509          | 0           | 0   | 0                    | 0                    | 0      | 28                   | 291       | 45        | 266     | 0                                                                                                                                          | 266 d_Bacteria; p_Proteobacteria; c_Alphaproteobacteria; o_Rickettsiales; f_Rickettsiaceae; g_Orientia; s_Rickettsia_endosymbiont_of_Bemisia_tabaci               |                                                                                                                                     |
| OTU28  | 0           | 68        | 0      | 0         | 0         | 0         | 0     | 0                   | 0                    | 0       | 0         | 0       | 0       | 0            | 0           | 0   | 0                    | 0                    | 17     | 0                    | 0         | 0         | 0       | 0                                                                                                                                          | 0 d_Bacteria; p_Proteobacteria; c_Gammaproteobacteria; o_Enterobacteriales; f_Enterobacteriaceae; g_Arsenophonus; s_Arsenophonus                                  |                                                                                                                                     |
| OTU29  | 25          | 0         | 0      | 0         | 0         | 0         | 0     | 0                   | 0                    | 0       | 0         | 0       | 0       | 0            | 0           | 0   | 0                    | 0                    | 0      | 0                    | 0         | 0         | 0       | 0                                                                                                                                          | 0 d_Bacteria; p_Chlamydiae; c_Chlamydiae; o_Chlamydiales; f_Simkaniaceae; g_Candidatus_Fritschea; s_Candidatus_Fritschea_bemisiae                                 |                                                                                                                                     |

**Table S3** Comparison of the symbionts found in this and in previous studies.

|                             | A1 | A2 | A3 | A4 | A5 | C1 | C2 | F | H | OLO | R1 | R2 | R3 | R4 | W1 | W2 | W3 |
|-----------------------------|----|----|----|----|----|----|----|---|---|-----|----|----|----|----|----|----|----|
| Asia I                      |    |    |    | √  |    |    |    |   |   | √   |    |    |    | √  |    |    |    |
| Asia II 1                   |    |    | √  | √  |    |    |    |   |   | √   |    |    |    |    |    | √  |    |
| Asia II 3                   |    | √  |    |    |    | √  |    |   | √ | √   | √  |    |    |    | √  |    |    |
| Asia II 5                   | √  |    |    | √  |    |    |    |   |   |     |    |    |    |    | √  |    |    |
| Asia II 6                   |    |    | √  |    |    |    |    |   |   | √   |    |    |    |    | √  |    |    |
| Asia II 7                   |    |    | √  | √  |    | √  |    |   |   | √   |    | √  |    |    | √  |    |    |
| Asia II 9                   |    |    | √  | √  | √  | √  |    |   |   |     |    |    |    |    |    |    |    |
| Australia                   |    |    | √  | √  |    |    |    |   |   |     |    |    |    |    | √  |    |    |
| <i>Bemisia afer</i> _Africa |    |    | √  | √  |    |    |    |   |   |     |    |    |    |    |    | √  |    |
| <i>Bemisia afer</i> _China  |    |    |    | √  |    |    |    |   |   |     |    |    |    |    | √  |    |    |
| China 1                     |    |    |    | √  |    |    |    |   |   | √   |    |    |    |    | √  |    |    |
| China 2                     |    |    |    |    |    |    |    |   | √ | √   |    |    |    |    | √  |    |    |
| Indian Ocean                |    |    |    |    |    |    | √  |   |   | √   |    |    |    |    |    |    |    |
| Italy 3                     |    |    |    |    |    |    |    |   |   |     |    |    |    |    | √  |    |    |
| Japan 2                     |    |    | √  | √  |    | √  |    |   |   |     |    |    |    |    | √  |    |    |
| MED                         |    |    |    |    |    | √  |    |   | √ |     | √  |    |    |    | √  | √  |    |
| MEAM1                       |    |    |    |    |    |    |    |   | √ |     | √  |    |    |    |    |    |    |
| New World 1                 | √  |    |    |    |    |    | √  | √ |   |     |    |    |    |    |    |    |    |
| New World 2                 |    |    |    |    |    |    |    |   | √ |     |    |    |    |    |    |    |    |
| SubSaharan Africa 1         |    |    |    | √  |    |    | √  |   |   | √   | √  |    |    |    | √  |    | √  |
| SubSaharan Africa 2         |    |    |    |    |    | √  |    |   |   |     |    |    |    |    | √  |    |    |
| SubSaharan Africa 6         |    |    |    |    |    |    |    |   |   |     |    |    |    |    |    | √  |    |
| Uganda                      |    |    | √  | √  | √  |    |    |   |   |     |    |    |    |    |    |    |    |

√: represent the strains found by the other studies; √: represent the strains found by this study; √: represent the strains found by this and the other studies.

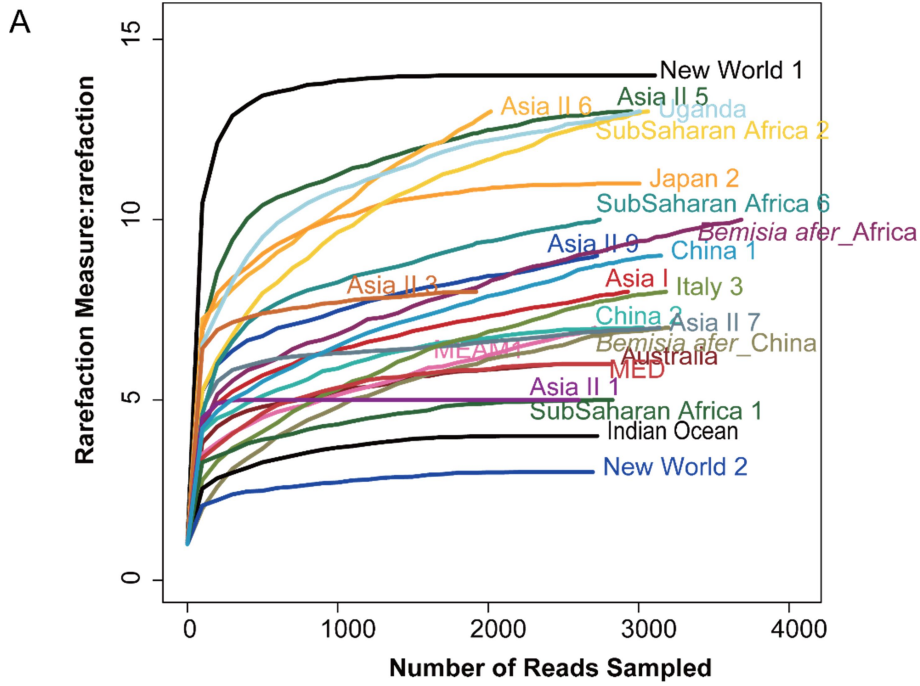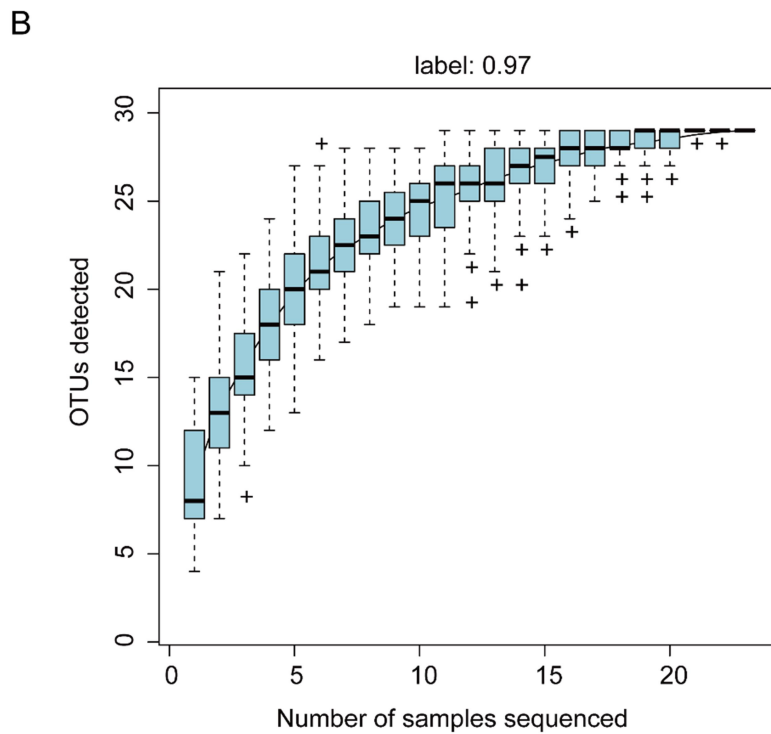

**Figure S1. (A)** The rarefaction curve from the 16S rRNA libraries constructed for each cryptic species, demonstrating that the amount of sequenced sample was sufficient for most cryptic species. **(B)** Species accumulation curves indicating that total bacteria species richness would probably increase with additional sampling effort.

### PCoA

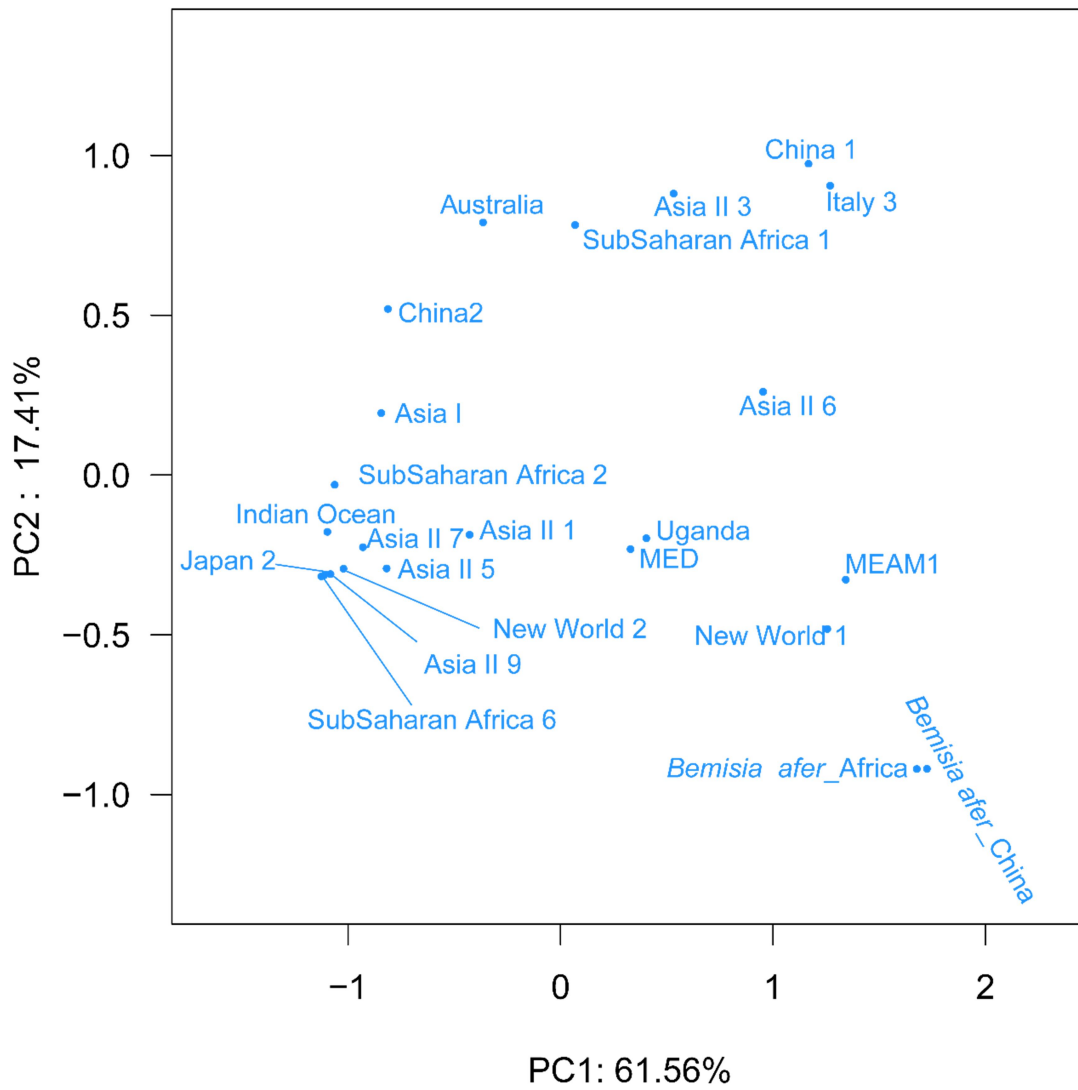

**Figure S2.** Principal coordinate analysis (PCoA) of unweighted UniFrac distances. Plots were made using Jackknifed UniFrac distances in QIIME (PC1 versus PC2).

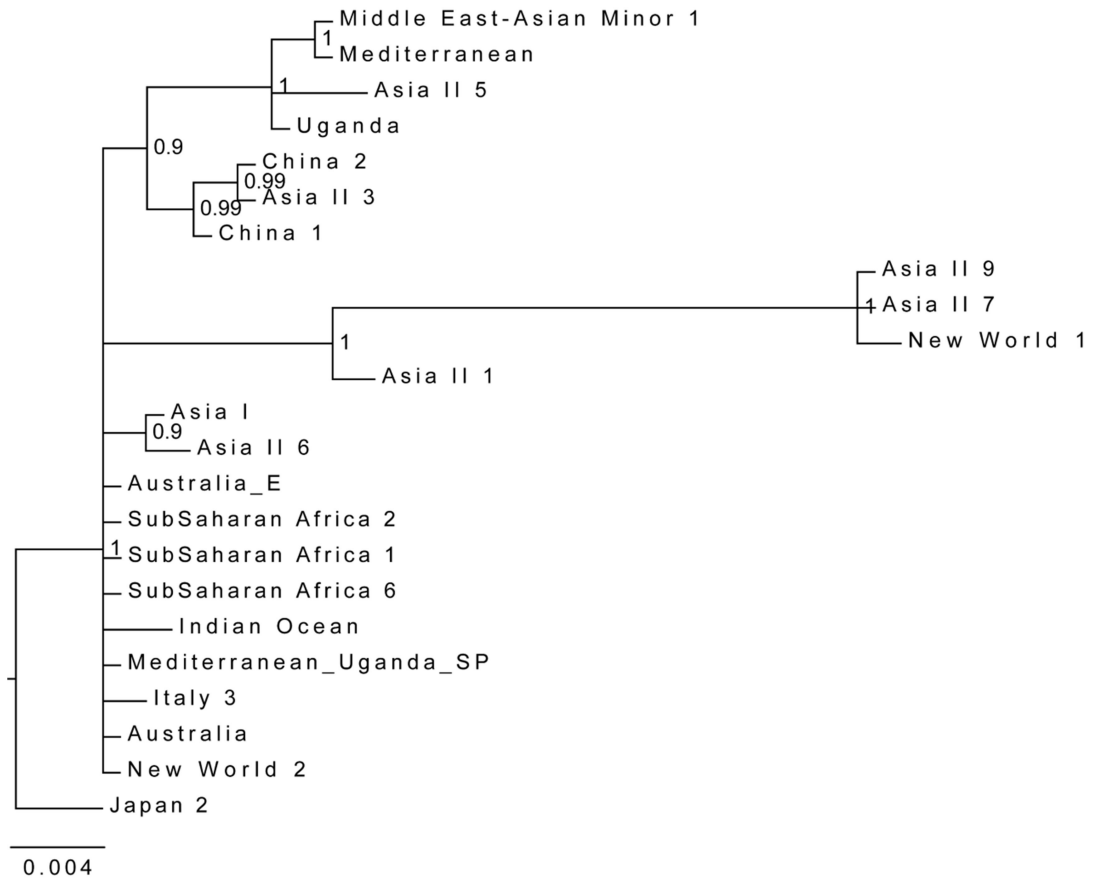

**Figure S3.** MrBaysian phylogenetic relationships of the *Portiera* from different cryptic species based on 904 bp 16S sequences. BI posterior probabilities were shown on the tree.

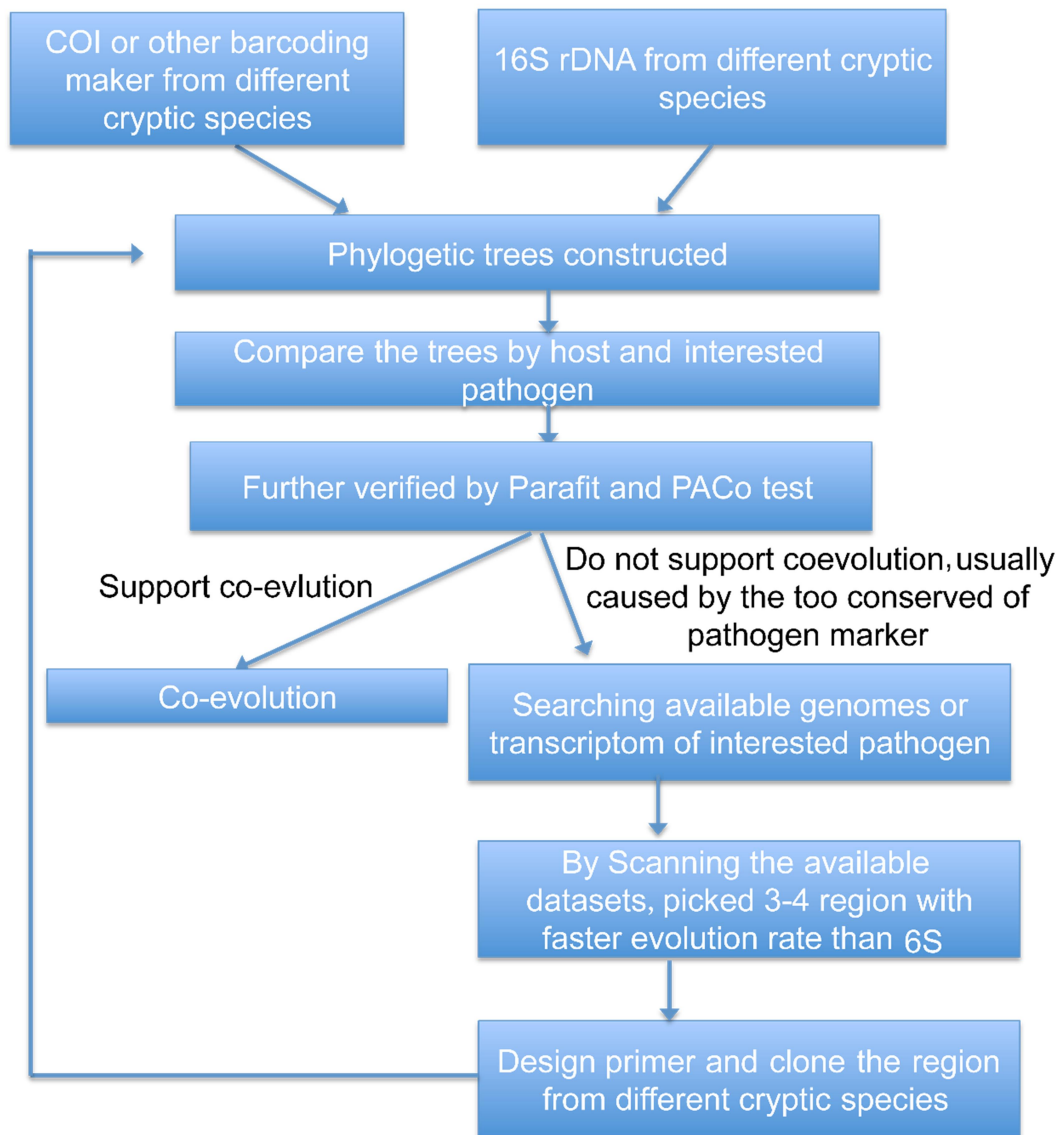

**Figure S4.** The strategy used to test the hypothesis that phylogenies of P-endosymbionts and their host *B. tabaci* are congruent.
